1 **Convergence of immune escape strategies highlights plasticity of SARS-CoV-2**  
2 **spike**

3 Xiaodi Yu<sup>2\*</sup>, Jarek Juraszek<sup>1\*</sup>, Lucy Rutten<sup>1</sup>, Mark J. G. Bakkers<sup>1</sup>, Sven Blokland<sup>1</sup>,  
4 Niels J.F. van den Broek<sup>1</sup>, Annemiek Y.W. Verwilligen<sup>1</sup>, Pravien Abeywickrema<sup>2</sup>,  
5 Johan Vingerhoets<sup>4</sup>, Jean-Marc Neefs<sup>3</sup>, Shah A. Mohamed Bakhsh<sup>5</sup>, Pavitra  
6 Roychoudhury<sup>5</sup>, Alex Greninger<sup>5</sup>, Sujata Sharma<sup>2</sup>, Johannes P. M. Langedijk<sup>1#</sup>

7

8

9

10 <sup>1</sup> Janssen Vaccines & Prevention BV, Leiden, the Netherlands

11 <sup>2</sup> Structural & Protein Science, Janssen Research and Development, Spring House, PA  
12 19044, USA

13 <sup>3</sup> Janssen Pharmaceutica N.V., Discovery Sciences, Beerse, Belgium

14 <sup>4</sup> Janssen Pharmaceutica N.V., Clinical Microbiology and Immunology, Beerse, Belgium

15 <sup>5</sup> Department of Laboratory Medicine and Pathology, Virology Division, University of  
16 Washington, Seattle, WA, USA

17

18 \*These authors contributed equally

19 #Corresponding author. e-mail: [hlangedi@its.jnj.com](mailto:hlangedi@its.jnj.com)

## 20 **Abstract**

21 The SARS-CoV-2 spike protein is the target of neutralizing antibodies and the immunogen used  
22 in all currently approved vaccines. The global spread of the virus has resulted in emergence of  
23 lineages which are of concern for the effectiveness of immunotherapies and vaccines based on  
24 the early Wuhan isolate. Here we describe two SARS-CoV-2 isolates with large deletions in the  
25 N-terminal domain (NTD) of the spike. Cryo-EM structural analysis showed that the deletions  
26 result in complete reshaping of the antigenic surface of the NTD supersite. The remodeling of the  
27 NTD affects binding of all tested NTD-specific antibodies in and outside of the NTD supersite  
28 for both spike variants. A unique escape mechanism with high antigenic impact observed in the  
29  $\Delta$ N135 variant was based on the loss of the Cys15-Cys136 disulfide due to the P9L-mediated  
30 shift of the signal peptide cleavage site and deletion of residues 136-144. Although the observed  
31 large loop and disulfide deletions are rare, similar modifications became independently  
32 established in several other lineages, highlighting the possibility of a general escape mechanism  
33 via the NTD supersite. The observed plasticity of the NTD foreshadows its broad potential for  
34 immune escape with the continued spread of SARS-CoV-2.

35

## 36 **Introduction**

37 The viral surface spike (S) protein of SARS-CoV-2 is critical for the viral life cycle, the primary  
38 target of neutralizing antibodies (1-4) and a key target for prophylactic vaccines. S is a large,  
39 trimeric glycoprotein that mediates both binding to host cell receptors and fusion of the viral and  
40 host cell membranes through its S1 and S2 subunits respectively (5-7). The S1 subunit comprises  
41 two distinct domains: an N-terminal domain (NTD) and a host cell receptor-binding domain  
42 (RBD) which are both targets of neutralizing antibodies and escape mutations are described for  
43 both regions (8). The immunodominant NTD binds antibodies with high neutralizing and  
44 protective potential (2, 9-15) and most SARS-CoV-2 variants have small deletions in the  
45 exposed protruding loops of NTD (16-19). In this study we characterize spikes of two isolates,  
46 obtained from samples from infected individuals in Peru ( $\Delta$ N25) and Brazil ( $\Delta$ N135) in January  
47 2021, both containing large deletions in the NTD. Additionally, the  $\Delta$ N135 isolate contains  
48 mutations in the RBD and a mutation in the signal peptide that together with the deletions result

49 in a major remodeling of the structure of the NTD due to loss of the 15-136 disulfide (DS<sub>15-136</sub>).  
50 Both S proteins fold correctly and maintain fusion capacity despite the disulfide loss and large  
51 deletions in a small beta-sheet on top of the NTD galectin fold ( $\beta_{N3N5}$ ). High resolution single-  
52 particle electron cryo-microscopy (Cryo-EM) structures supplemented with antigenicity profiling  
53 underline the potential impact of these deletions on immune escape.

54

## 55 **Results**

56 Next-generation sequencing analysis of SARS-CoV-2 RNA isolated from nasal swab samples  
57 collected from study participants in the Phase 3 trial of the Ad26.COV2.S vaccine  
58 (VAC31518COV3001, Ensemble, funded by Janssen Research and Development and others,  
59 ClinicalTrials.gov number NCT04505722(20)) revealed various adaptations in the S gene  
60 sequences. Multiple study participants from Peru and one from Argentina showed common  
61 mutations in the NTD and the RBD and a unique large deletion of residues 63-75 in the N2 loop  
62 of the spike. Since the spike has the deletion in the N5 loop common for C37 and the novel N2  
63 loop deletion, the spike is named  $\Delta N25$  (Fig 1 and Table S1). Samples obtained from two study  
64 participants that were taken on January 12<sup>th</sup> and 17<sup>th</sup> of 2021 in Sao Paulo, Brazil, showed  
65 identical amino acid sequences for the S protein that were very different from the global  
66 consensus. Apart from several earlier described mutations in the RBD, these sequences showed a  
67 mutation in the signal peptide and two large deletions in the NTD of residues 136-144, a beta-  
68 strand preceding the N3 loop, and residues 258-264 in the N5-loop and therefore this spike is  
69 named  $\Delta N135$  (Fig. 1, Table S1).

70

## 71 **Variant spikes remain fusogenic**

72 Given the extensive changes that  $\Delta N25$  and  $\Delta N135$  spikes had accumulated compared to the  
73 original SARS-CoV-2 strain, we attempted to confirm their ability to successfully accomplish  
74 membrane fusion. We measured the impact of the changes in the full-length variant spikes on  
75 fusion activity compared with the wild-type Wuhan-Hu-1 (GenBank accession number:  
76 MN908947) in a cell-cell fusion assay that makes use of a fluorescent reporter protein to  
77 visualize syncytia formation (21). HEK293 cells were transiently transfected with plasmids

78 encoding S, ACE2, TMPRSS2 and GFP. Transfection of GFP alone, or of a prefusion-stabilized  
79 S protein did not yield syncytia. On the contrary, major syncytia formation was observed with  
80 the Wuhan-Hu-1 S protein. Likewise, when cells were transfected with either one of the two  
81 variant S proteins, clear syncytia were visible. These data demonstrate that the variant S proteins  
82 remain fully functional despite considerable changes in the NTD (Fig 2.A).

83

#### 84 **Characterization of the $\Delta$ N25 and $\Delta$ N135 spikes**

85 We designed soluble versions of the variant S proteins and produced them in transiently  
86 transfected expi293F cells to enable biochemical and structural characterization. To obtain high  
87 quality S proteins with reasonable yields, the furin cleavage site was mutated and stabilizing  
88 substitutions to proline were added at positions 892, 987, and 942 in the S2 domain(22). The  
89 variant spikes were produced at levels comparable to the Wuhan spike in the crude cell culture  
90 supernatant (Fig 2B). The quaternary structure of the  $\Delta$ N25 spike was less stable and showed a  
91 higher fraction of monomeric S compared to the  $\Delta$ N135 and Wuhan variants. After purification,  
92 only trimeric S proteins remained (Fig 2C). These purified proteins were used for all subsequent  
93 experiments. All three S proteins showed the typical minor melting event at approximately 49°C  
94 and a higher main melting event that differed among the spikes. The  $T_{m50}$  of the  $\Delta$ N25 spike was  
95 2.5°C higher, and that of the  $\Delta$ N135 spike was 2.5°C lower, as compared to the Wuhan spike (Fig  
96 2D, Supplementary Figure 1).

97

98

#### 99 **Antigenicity of the variant spikes**

100 To investigate the impact of the variant point mutations and deletions on the antigenicity,  
101 we measured binding of a selection of MAbs to the  $\Delta$ N25 and  $\Delta$ N135 spikes and compared it with  
102 the binding to the Wuhan-Hu-1 spike. The antigenic assessment was performed using biolayer  
103 interferometry to measure S protein binding to ACE2-Fc and a panel of six SARS-CoV-2  
104 neutralizing antibodies directed against the RBD (S2M11, S2E12, C144, 2-43, S309 and  
105 COVA2-15 (2, 23-26)), three neutralizing antibodies against the supersite of the NTD (2-51,

106 COVA1-22 and 4A8 (10, 14, 26)) and a non-neutralizing antibody against the lower part of the  
107 NTD (DH1055(11)) (Fig. 3). The NTD-specific antibodies lost all binding to both variant spikes,  
108 except for some residual binding of DH1055 to the  $\Delta$ N135 S protein. Although ACE2-Fc was  
109 still able to bind, MAbs 2-43 and COVA2-15 lost all binding to the variant spikes. Binding to the  
110 RBD of the  $\Delta$ N135 variant was most significantly impacted and out of the entire panel, only  
111 S2E12 and S309 antibodies directed against conserved RBD sites were not or hardly affected.  
112 The loss of binding to the RBD is most likely caused by the E484K mutation, which is part of the  
113 epitopes of the MAbs SM11, 2-43, C144 and COVA2-15 (27-29).

114

### 115 **Shift in signal peptide cleavage site and subsequent loss of disulfide**

116 In SARS-CoV-2 S, a conserved cysteine Cys15 is present near the N-terminus of the  
117 mature protein and forms a disulfide bond with Cys136. Only in the case of the branch of  
118 coronaviruses that includes SARS-CoV-2 S, the cysteine is located almost directly adjacent, two  
119 amino-acids away from the signal peptide (SP) cleavage site (red in Fig. S2). Mutations in the  
120 signal peptide that shift the cleavage position downstream of Cys15, would prevent disulfide  
121 DS<sub>15-136</sub> from forming and consequently impact the structural architecture of the NTD. To  
122 investigate the effect of the signal peptide P9L mutation, we performed liquid chromatography-  
123 mass spectrometry (LC-MS/MS) from a tryptic digest of purified Wuhan-Hu-1 and the  $\Delta$ N135 S  
124 protein to determine the N-terminal residue of the mature proteins. We found that, in line with  
125 published observations(21), the Wuhan-Hu-1 S protein was cleaved after position 13 (Fig. 4a,  
126 Fig. S3). In contrast, for the  $\Delta$ N135 S protein no peptides were detected up to N-terminal residue  
127 22. Whereas the SignalP-6.0 prediction software predicted the loss of the cysteine by cleavage  
128 directly C-terminal to Cys15, according to LC-MS/MS the N-terminus is truncated by 7  
129 additional residues (Fig. 4a). Interestingly, in the  $\Delta$ N135 spike the loss of Cys15 is accompanied  
130 by the loss of Cys136 due to the large deletion of residues 136-144. The loss of both cysteines  
131 could indicate a compensatory mutation since an unpaired cysteine can impact correct folding of  
132 the spike.

133

### 134 **CryoEM analysis of variant spikes.**

135 To understand the structural impact of the large NTD deletions and the loss of DS<sub>15-136</sub> ( $\Delta$ DS<sub>15-</sub>  
136 <sub>136</sub>) in the Brazilian variant, we solved the structures of the stabilized ectodomains of both spike  
137 variants by CryoEM analysis. The overall structure of the  $\Delta$ N25 and  $\Delta$ N135 trimers are the same  
138 as that of the Wuhan spike with the D614G mutation except for the loops in the NTD (Fig. 4 bc,  
139 Fig S4). From the  $\Delta$ N25 spike dataset, one stable class with one RBD-up was able to be refined  
140 into high resolution (Table S2, Fig S5a, S6). The  $\Delta$ N25 spike has a 7-residue deletion in the N5  
141 loop typical for the C.37 lineage(30). As a result of this deletion and the complete loss of the N2-  
142 loop due to the large 13-residue deletion of residues 63-75, the N5-loop shifts towards the N2  
143 and N1 loops and concomitantly, the N3-loop shifts to a position previously occupied by N5. As  
144 a result of the deletions and N-loop shifts, the 3-strand  $\beta$ -sheet formed by N3 hairpin and N5  
145 ( $\beta_{N3N5}$ ) on top of the galectin-fold is lost and as a result, the N4-loop is shifted away from the  
146 other loops. The deletions and remodeling of N2, N3, N4 and N5 result in major antigenic  
147 changes in the NTD supersite (Fig. 4 b and c). Compared with the Wuhan spike with the same  
148 stabilizing mutations, the  $\Delta$ N135 variant is more open. It acquires predominantly the 1-RBD up  
149 conformation (73% 1-up, 23% down) compared to 20% 1-up, 80% down for the Wuhan variant  
150 (Table S2, Fig. S5b, S6). This increase in the RBD ‘up’ state is likely due to the E484K  
151 mutation, previously described to influence this balance (31). Deletion of N1 results in loss of  
152 DS<sub>15-136</sub> and exposes a hydrophobic patch which contributes to a large reorganization of the NTD  
153 loops. The conserved N2 loop has completely shifted position and occupies the space of the  
154 deleted N1 loop (Fig 4c). The deletion of one of the strands of the N3 beta-hairpin destroys the  
155 3-strand  $\beta$ -sheet  $\beta_{N3N5}$  (Fig.1C). As a result, N3 completely shifts and occupies the space of the  
156 deleted N1 loop. Finally, the deletion in N5 and the loss of the secondary structure of  $\beta_{N3N5}$   
157 results in a shift of N5 to the space previously occupied by N2 and N4 shifts away from the other  
158 loops. The loss of DS<sub>15-136</sub> and  $\beta_{N3N5}$  due to the deletions in N1, N3 and N5 causes a dramatic  
159 remodeling of the N2, N3, N4 and N5 loops that includee the NTD supersite (Fig. 4bc) and a  
160 reduced stability of the spike (Fig. 2D).

161

## 162 **Spread of the DS<sub>15-136</sub> breaking mutations**

163 P9L and the previously described S13I (32) cause a shift in signal peptide cleavage, resulting in  
164 the loss of Cys15. This SP-shift can be indirectly detected by the loss of binding to MAb

165 COVA1-22 (Fig. 5) which depends on the NTD N-terminus. A panel of common SP mutations,  
166 including P9L and S13I, was evaluated for Mab COVA1-22 binding to investigate the  
167 occurrence of both the signal peptide cleavage shift and concomitant loss of DS<sub>15-136</sub>. Apart from  
168 P9L, S13I and C15F, only S12P resulted in reduced COVA1-22 binding which agreed with the  
169 predicted signal peptide cleavage shift and concomitant loss of Cys15 according to the SignalP -  
170 6.0 software (33) (Figure 5).

171 NTD is a hotspot for deletions in the S protein, and the same deletions keep evolving on  
172 independent branches of the phylogenetic tree of S (Fig 6A).  $\Delta$ DS<sub>15-136</sub> can occur via mutation or  
173 deletion of either of the two cysteine residues (Fig. 6B). S13I and P9L are the most frequent  
174 causes for the loss of Cys15 via the cleavage site shift mechanism, but direct mutation of Cys15  
175 is also observed (Supplementary Table 3). Cys136 is removed only via direct mutation and  
176 occurs less often. Approximately half of the lineages with  $\Delta$ DS<sub>15-136</sub> have both cysteines  
177 removed as in the Russian AT.1 lineage (34) or the C1.2 lineage (35). The distribution of the  
178  $\Delta$ DS<sub>15-136</sub> variants on the phylogenetic tree of SARS-CoV-2 S (Fig. 6C) and the different paths  
179 leading to the disulfide loss (Table S3) suggest that  $\Delta$ DS<sub>15-136</sub> could have evolved in multiple  
180 lineages independently, and in several cases became dominant within the lineages. Figure 6d  
181 shows the most significant incidences of  $\Delta$ DS<sub>15-136</sub> in SARS-CoV-2 lineages. Before the Delta  
182 became dominant and outcompeted many of these lineages, in many cases, percentage of  $\Delta$ DS<sub>15-</sub>  
183 <sub>136</sub> showed an ascending trend. After replacement of most of the strains by Delta and  
184 subsequently Omicron lineages, once again,  $\Delta$ DS<sub>15-136</sub> is reemerging in diverse geographical  
185 locations (Table S4).

186

## 187 **Discussion**

188 The rapid global spread of SARS-CoV-2 leads to recurrent emergence of variants with  
189 either higher transmissibility or decreased recognition by protective immune response. The NTD  
190 undergoes rapid antigenic drift and accumulates a larger number of mutations and especially  
191 deletions relative to other regions of the spike (Fig 6A). In this study, we describe two spike  
192 variants, one from Peru and one from Brazil with typical point mutations in the RBD but  
193 dramatic and rare deletions in the NTD (Fig 1). Since the observed deletions are extensive, we  
194 examined folding and function of the variant spikes and investigated their structural impact. Both

195 spikes showed robust expression and maintained fusogenicity, and the purified soluble proteins  
196 showed comparable thermostability and ACE2 binding (Fig 2, Fig S1). As a result of deletions,  
197 both spikes show complete loss of antibody binding to the NTD supersite (Fig 3, Fig 4).  
198 Additionally, the mutations in the  $\Delta$ N135 spike impacted binding of most of the RBD specific  
199 antibodies (Fig 3). The  $\Delta$ N25 variant derived from the C.37 lineage, a variant of concern (VOC)  
200 with a large 7-residue deletion in the N5 loop (30) acquired an additional 13-residue deletion in  
201 the N2 loop compared to C37. The  $\Delta$ N135 variant belonging to the B.1.1.294 lineage acquired  
202 three large deletions: a 9- and a 7-residue deletion in the N3 and N5 loop respectively, and a  
203 deletion of the N-terminus as a result of signal peptide cleavage shift leading to the  $\Delta$ DS<sub>15-136</sub> loss.  
204 Structural analysis of the proteins using CryoEM showed that the overall fold of the spikes was  
205 maintained and the galectin-fold of the NTD remained intact despite the large deletions and loss  
206 of the disulfide bridge (Fig S4, Fig S5). However, the loops that constitute the NTD supersite  
207 were completely remodeled or relocated in both proteins (Fig 4), which explains the dramatic  
208 changes to the NTD antigenicity profile. In the  $\Delta$ N25 spike complete deletion of the N2 and  
209 partial deletion of N5 loop results in large shift of the N3 and N4 loops. In the  $\Delta$ N135 spike, N2  
210 and N3 move to the position of the deleted N1 and N4 moves away from the other loops. The  
211 relocation of the loops was enabled by the loss of the  $\beta_{N3N5}$   $\beta$ -sheet due to deletion of the N3  $\beta$ -  
212 hairpin and the deletion in the N5 loop.

213 Aside of the extensive loop deletions, the virus can remodel the NTD supersite by shifting its  
214 signal peptide cleavage site with the P9L point mutation. We experimentally verified that the  
215 mutation causes a longer truncation of the N-terminus by Mass spectrometry of tryptic digests,  
216 loss of binding to MAb COVA1-22 specific for the NTD N-terminus and by the CryoEM  
217 structure determination (Figs 3, 4, 5). S13I and to a lesser extend S12P also cause the peptide  
218 cleavage shift (Fig. 5) (32). Next to the direct mutation or deletion of one of the cysteines, the  
219 signal peptide mutations constitute an additional mechanism via which  $\Delta$ DS<sub>15-136</sub> can occur.

220 The mutations that shift the cleavage site, together with the Cys15 and Cys136 mutations and  
221 deletions were used to identify  $\Delta$ DS<sub>15-136</sub> variants in the GISAID database (Supplementary Table  
222 S3, Fig 6B, Fig 6C). Although these modifications are relatively rare,  $\Delta$ DS<sub>15-136</sub> is widespread  
223 both geographically and in terms of occurrences on the phylogenetic tree of S. This new escape  
224 mechanism arose independently in different geographical locations and even became dominant



225 in some lineages until Delta replaced most other variants around the world. However recently, in  
226 the midst of the ongoing Omicron wave, Colson et al (36) reported an emergence of a new  
227 concerning variant (B.1.640.2) in Southern France, probably of Cameroonian origin which also  
228 evolved the  $\Delta DS_{15-136}$  feature.

229 In the last two years, the NTD domain of the SARS-CoV-2 spike has been confirmed as a  
230 hotspot for deletions (Fig 6A). Within NTD, deletions are further clustered around a few sites:  
231 residues 69-70, 141-143, 156-159 and 242-245. Deletions at these sites recur independently in  
232 large number of unrelated lineages, as depicted in the phylogenetic trees of SARS-CoV-2 S in  
233 Fig 6A. The large capacity for deletions in N2, N3 and N5 loops together with the ability to  
234 remove N1 with the  $\Delta DS_{15-136}$  mechanism to further rearrange all surrounding loops allows the  
235 virus to completely remodel the NTD supersite, as depicted in Fig 4 and Fig. S7. Moreover, the  
236 mechanism of reshaping the loops via  $\Delta DS_{15-136}$  seems to have evolved independently in multiple  
237 branches of the SARS-CoV-2 phylogenetic tree, suggesting this important escape mechanism  
238 may also play a role in the future variants of concern.

239 As collective immunity to the virus grows, immune evasion will likely become an important  
240 fitness advantage, as recently observed for the Omicron variant. It is likely that escapes via  
241 structurally tolerated large deletions and/or the  $\Delta DS_{15-136}$  mechanism will occur again when  
242 selection based on immune evasion continues. In fact, deletions of the loops are already firmly  
243 incorporated in the Delta and Omicron lineages.  $\Delta DS_{15-136}$  has also been registered in these  
244 variants of concern albeit at low frequencies. When analyzed locally (Supplementary Table S4),  
245 at the end of the Delta wave Delta lineages in Sweden and Chile started to develop  $\Delta DS_{15-136}$ .  
246 With the rise of Omicron these lineages were eventually outcompeted, but the first cases of  
247 Omicron BA.1 and BA.1.1  $\Delta DS_{15-136}$  have also recently been registered in some US states. With  
248 increasing global immunity, the escape mechanisms that are currently rare, should be closely  
249 monitored and it would be important to understand the constraints of the NTD erosion and the  
250 balance between NTD function and structural integrity.

251

252 **Acknowledgements**

253 We thank Lam Le and Pascale Boucher for technical support. We would like to thank Marit van  
254 Gils for kindly providing COVA1-22 and COVA2-15.

255

256

### 257 **Author contribution**

258 X.Y., J.J., L.R., M.J.G.B. and J.P.L designed the study, X.Y., J.J., L.R., M.J.G.B, S.B.,  
259 N.J.F.vdB, A.Y.W.V., P.A., J.V., J.N., planned and / or performed biochemical assays and  
260 purifications, X.Y. and P.A performed EM sample preparation, data collection, data processing  
261 and analysis, J.J. and J.N performed bioinformatic analysis, S.M.B., P.R and A.G planned and /  
262 or performed sequencing and analysis, X.Y., J.J., L.R., M.J.G.B. J.V., S.S. and J.P.L wrote the  
263 paper

264

### 265 **Conflict of Interest**

266 The authors declare no competing financial interests. J.J., L.R., M.J.G.B. and J.P.L. are co-  
267 inventors on related vaccine patents. X.Y., J.J., L.R., M.J.G.B, S.B., N.J.F.vdB, A.Y.W.V., P.A.,  
268 J.V., J.N., S.S.and J.P.L. are employees of Janssen Vaccines & Prevention BV J.J., LR, J.V. and  
269 J.P.L hold stock of Johnson & Johnson.

270

### 271 **Figure legends**

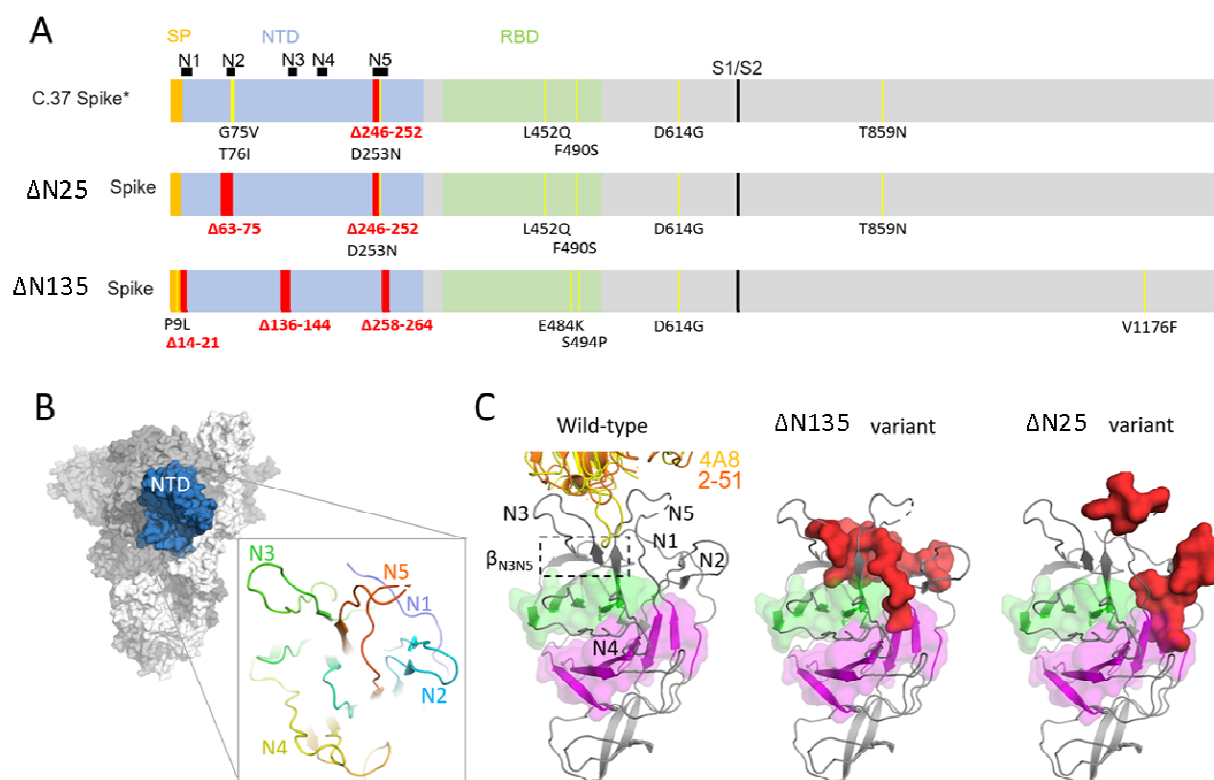

272

273 **Figure 1. a** Schematic representation of the C.37, ΔN25 and ΔN135 spikes with signal peptide  
 274 (SP) indicated in yellow, N-terminal domain (NTD) in blue with the five NTD loops indicated  
 275 above the bar, receptor binding domain (RBD) in green, S1/S2 cleavage site in black and  
 276 mutations in yellow and deletions in red. **b** Sideview of a spike with the NTD domain in blue.  
 277 NTD loops N1 (blue), N2 (cyan), N3 (green), N4 (yellow) and N5 (orange) are plotted in the  
 278 inset as ribbon **c** Left panel: sideview of the NTD with the two sheets of the galectin-fold in  
 279 green and magenta and indicated N-loops. The  $\beta_{N3N5}$  sheet on top of the galectin-fold is boxed  
 280 with a dashed line. As a reference for the NTD supersite, structures of Fabs 4A8(10) (PDBID  
 281 7C2L)<sup>1</sup> and 2-51 (PDBID 7L2C) (14) are indicated in yellow and orange ribbons. In the middle  
 282 and right panels, the deleted amino acids are depicted for the ΔN25 and ΔN135 spikes in red as  
 283 spacefilling representation.

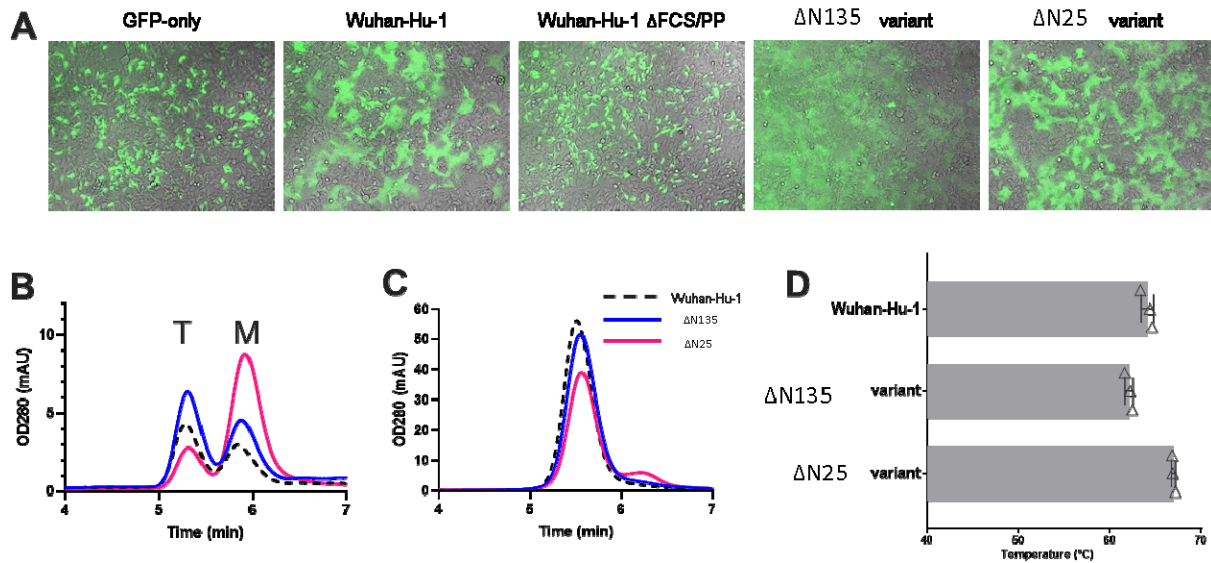

284

285 **Figure 2. Characterization of variant spikes.** a Cell-cell fusion assay in HEK293 cells by co-  
286 transfection of plasmids encoding S protein, ACE2, TMPRSS2, and GFP. Shown are overlays of  
287 the GFP and brightfield channels 24 hr after transfection. The different S protein constructs are  
288 indicated; 'GFP-only' did not include S plasmid. (b) Analytical SEC chromatograms of the S  
289 Wuhan-Hu-1 S variant (black dotted line), the  $\Delta$ N135 S variant (blue line) and the  $\Delta$ N25 S variant  
290 (magenta line) in cell culture supernatants on an SRT-10C SEC-500 15 cm column. The T  
291 indicates the trimer peak and the M indicates the monomer peak. (c) SEC chromatograms of the  
292 purified trimers of the S variants. Coloring is the same as in figure 2b. (d) Main melting event  
293 temperatures (TM<sub>50</sub>) of the S protein variants. Data are represented as mean + SD of n = 3  
294 replicates.

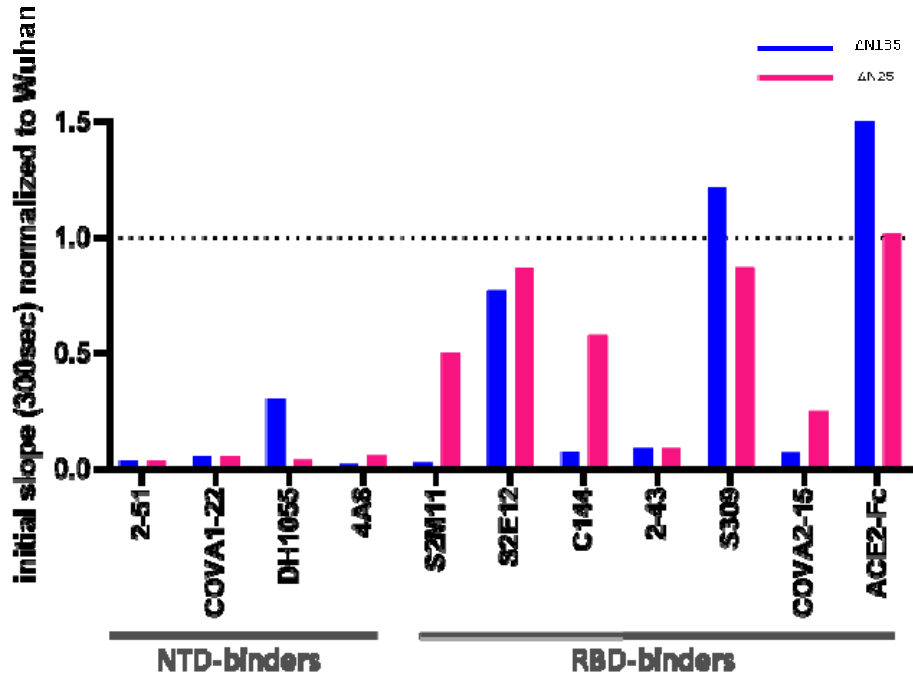

295

296 **Figure 3 Biolayer Interferometry.** Binding of NTD and RBD-specific MAbs and ACE2-Fc to  
 297 purified  $\Delta N135$  (blue) and  $\Delta N25$  (magenta) S trimer variants measured with BioLayer  
 298 Interferometry, showing the initial slope  $V_0$  at the start of binding, normalized to that of the  
 299 Wuhan variant (dashed line).

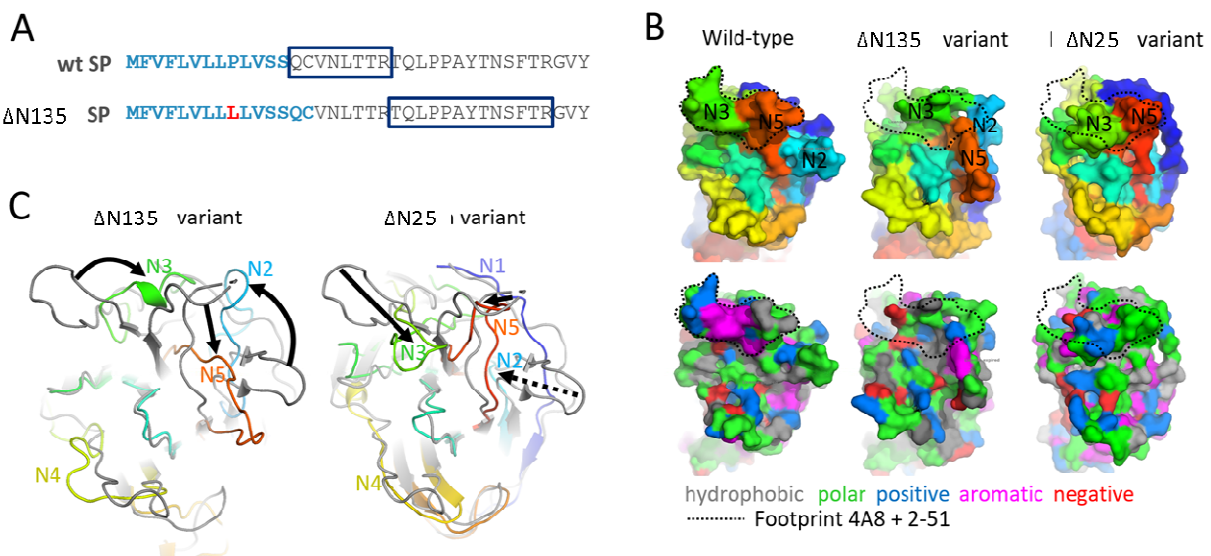

300

301

302 **Figure 4. Conformational plasticity of NTD in spike variants. A.** The signal peptide predicted  
 303 by SignalP-6.0 of the wt SP and the  $\Delta$ N135 SP are shown in blue bold characters. The mutation  
 304 in the  $\Delta$ N135 S is shown in red. Most N-terminal peptide detected using mass spectrometry is  
 305 boxed. The peptides QCVNLTTR, VNLTTR or NLTTR are not found for the  $\Delta$ N135variant S.  
 306 B. Surface representation of the NTD supersite (same view as Fig. 1B). The color code in the  
 307 upper panels is the same as in Fig. 1B. The color code in the bottom panels is based on residue  
 308 type – hydrophobic in grey, polar in green, positively charged in blue, negatively charged in red  
 309 and aromatic in magenta. Dashed contours indicate the joint footprint of MAbs 4A8 plus 2-51 on  
 310 the reference spike. The epitope contour was also plotted over the variant NTDs as guidance to  
 311 indicate the changes introduced by the deletions. C. Superposition of ribbon representation of the  
 312 reference NTD (grey, PDBID 7C2L) and variant NTDs with colors and view as in Fig 1B.  
 313 Arrows indicate rearrangement of the loops as a result of the deletions. The dashed arrow  
 314 indicates the complete deletion of the N2 loop in the  $\Delta$ N25 variant.

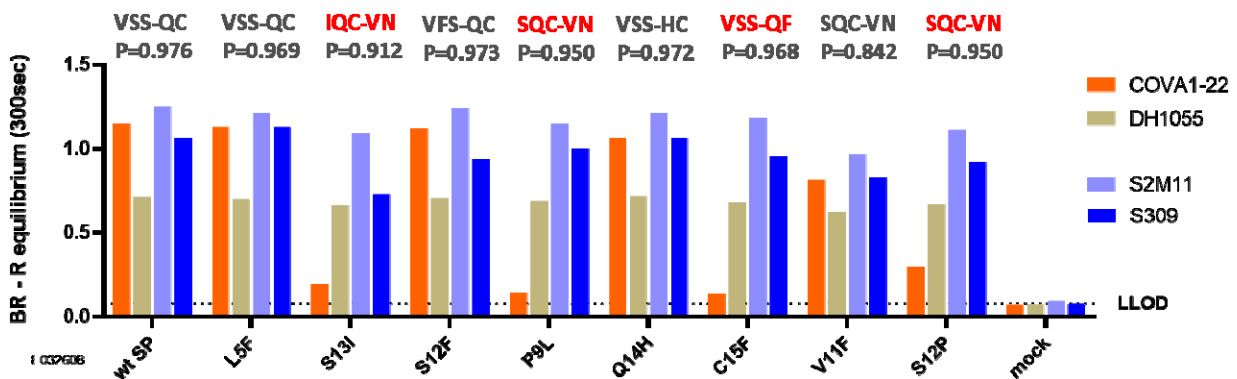

315  
 316 **Figure 5. Impact of SP mutations on Spike NTD antigenicity.** Binding of Mabs COVA1-22,  
 317 DH1055, S2M11 and S309 to the S trimer with the wild type signal peptide (wt SP) and with  
 318 different mutations in or just after the signal peptide, measured with Biolayer Interferometry  
 319 using Octet. The R equilibrium calculated at 300 seconds is shown as bars. Probability (P) of the  
 320 signal peptide cleavage site as predicted by SignalP 6.0 is shown above the bar graph. Mutations  
 321 that result in loss of Cys15-Cys136 are indicated in red. Octet analysis was performed on crude  
 322 cell culture supernatants.

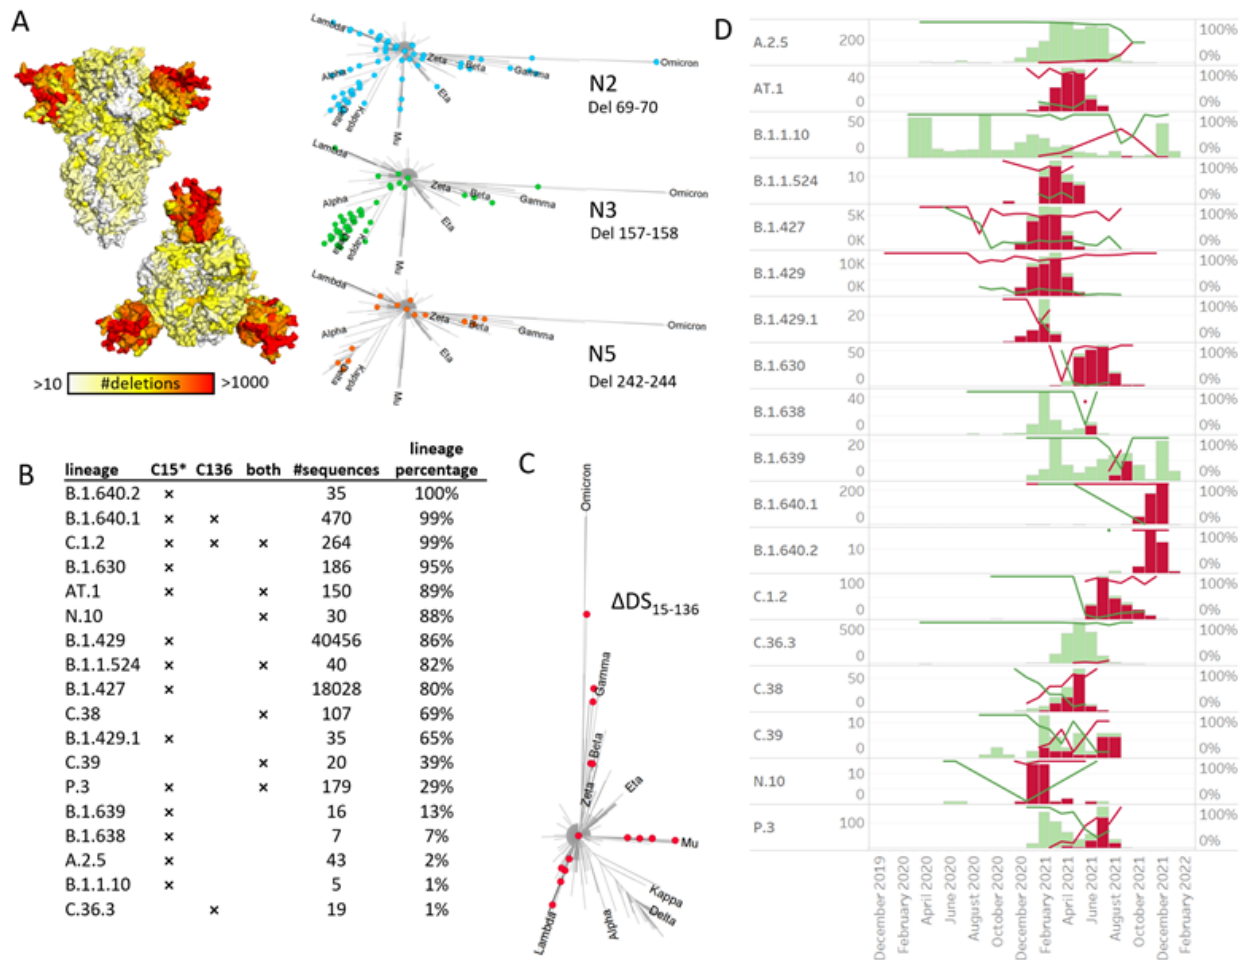

323

324 **Figure 6. NTD deletions and occurrences of  $\Delta DS_{15-136}$  loss in lineages.** A. Deletion frequency  
 325 based on GISAID 25 Jan 2022, plotted on spike surface (side and top view). White corresponds  
 326 to positions with less than 10 deletions registered on GISAID, while red is assigned to positions  
 327 with more than 1000 deletions observed. In the right panels, deletions in N2, N3 and N5 loops  
 328 are plotted on the S-protein phylogenetic trees (see Materials and Methods section), with the  
 329 major variants of concern indicated as reference. Only deletions that were identified in more than  
 330 1% of their respective lineage sequences are plotted. B. List of lineages containing at least 1% of  
 331  $\Delta DS_{15-136}$  variants. For each lineage, the mechanism of the  $\Delta DS_{15-136}$  loss is indicated with a cross,  
 332 where C15\* stands for both a direct C15 mutation or deletion, or signal peptide mediated  
 333 cleavage site shift. C136 stands for C136 mutation, and “both” indicates both cysteines were  
 334 removed via any of the possible mechanisms. The fraction of  $\Delta DS_{15-136}$  sequences within each  
 335 lineage was calculated in the last column. C. Lineages containing at least 1% of  $\Delta DS_{15-136}$

336 variants plotted on the phylogenetic tree of SARS-CoV-2 S. D. Time evolution of the  $\Delta$ DS<sub>15-136</sub>  
337 containing lineages, with variants containing the cystine bridge colored in green and variants  
338 with the cystine bridge absent colored in red. The bars depict lineage counts for each month (left  
339 axis), and the lines – percentages within each lineage of both sub-variants (right axis).

340

## 341 **Methods**

### 342 **Clinical Samples**

343 Nasal swab specimens from SARS-CoV-2 RT-PCR confirmed cases, selected to be as close as  
344 possible to the onset of symptoms and having a SARS-CoV-2 viral load >200 copies/mL, were  
345 selected for sequencing. Molecular confirmation of SARS-CoV-2 infection and viral load  
346 quantification was performed using the Abbott RealTime SARS-CoV-2 RT-PCR at the Virology  
347 Laboratory of the University of Washington, Department of Laboratory Medicine and Pathology  
348 (UW Virology, Seattle, US), .

### 349 **Next-generation sequencing**

350 Next-generation sequencing (NGS) was performed by UW Virology using the clinically  
351 validated Swift Biosciences SNAP Version 2.0 assay (Integrated DNA Technologies). The  
352 SNAP assay utilizes multiple overlapping amplicons in a single tube to prepare ready-to-  
353 sequence libraries. The primer pairs used in SNAP were designed for generating libraries from  
354 first- or second-strand cDNA produced from viral isolates or clinical specimens enabling  
355 successful SARS-CoV-2 library preparation from samples with low viral titers. The Swift  
356 Biosciences SARS-CoV2 Version 2.0 kit (Catalog # CovG1 V2-96) has been optimized to  
357 achieve additional genome coverage on the Illumina sequencing platforms. A full clinical  
358 validation with determination of analytical sensitivity and specificity, limit of detection,  
359 accuracy, and assay precision (reproducibility and repeatability) has been performed.

360

### 361 **Protein expression and purification**

362 Plasmids corresponding to the SARS-CoV2 S variant proteins truncated after residue 1208 and  
363 with stabilizing substitutions A892P, A942P, D614N and V987P and a furin cleavage site knock



364 out (R682S, R685G) were synthesized and codon-optimized at GenScript (Piscataway, NJ  
365 08854). The constructs were cloned into pCDNA2004 or generated by standard methods widely  
366 known within the field involving site-directed mutagenesis and PCR and sequenced. The  
367 expression platform used was the Expi293F cells. The cells were transiently transfected using  
368 ExpiFectamine (Life Technologies) according to the manufacturer's instructions and cultured for  
369 6 days at 37°C and 10% CO<sub>2</sub>. The culture supernatant was harvested and spun for 5 minutes at  
370 300 g to remove cells and cellular debris. The spun supernatant was subsequently sterile filtered  
371 using a 0.22 µm vacuum filter and stored at 4°C until use. S trimers were purified using a two-  
372 step purification protocol by Lentil Lectin from *Galanthus Nivalis* (Vector labs, catalog AL-  
373 1243., followed by size-exclusion chromatography using a HiLoad Superdex 200  
374 16/600column (GE Healthcare).

### 375 **Antibodies and reagents**

376 ACE2-Fc was made according to Liu et al. 2018. *Kidney international*. For 2-51, DH1055, 4A8,  
377 S1M11, S2E12, C144, 2-43 and S309 the heavy and light chain were cloned into a single IgG1  
378 expression vector to express a fully human IgG1 antibody. Antibodies were produced by  
379 transfecting the IgG1 expression constructs using the ExpiFectamine™ 293 Transfection Kit  
380 (ThermoFisher) in Expi293F (ThermoFisher) cells according to the manufacturer specifications.  
381 Purification from serum-free culture supernatants was done using mAb Select SuRe resin (GE  
382 Healthcare) followed by rapid desalting using a HiPrep 26/10 Desalting column (GE  
383 Healthcare). The final formulation buffer was 20 mM NaAc, 75 mM NaCl, 5% Sucrose pH 5.5.  
384 COVA1-22 and COVA2-15 have been kindly provided by Marit van Gils.

### 385 **Differential scanning fluorometry (DSF)**

386 0.2 mg of purified protein in 50 µl PBS pH 7.4 (Gibco) was mixed with 15 µl of 20 times diluted  
387 SYPRO orange fluorescent dye (5000 x stock, Invitrogen S6650) in a 96-well optical qPCR  
388 plate. A negative control sample containing the dye was only used for reference subtraction. The  
389 measurement was performed in a qPCR instrument (Applied Biosystems ViiA 7) using a  
390 temperature ramp from 25–95 °C with a rate of 0.015 °C per second. Data was collected  
391 continuously. The negative first derivative was plotted as a function of temperature. The melting  
392 temperature corresponds to the lowest point in the curve.

### 393 **BioLayer Interferometry (BLI)**

394 The antibodies were immobilized on anti-hIgG (AHC) sensors (FortéBio cat#18-5060) in 1x  
395 kinetics buffer (FortéBio cat#18-1092) in 96-well black flat bottom polypylene microplates  
396 (FortéBio cat#3694). The experiment was performed on an Octet RED384 instrument (Pall-  
397 FortéBio) at 30 °C with a shaking speed of 1,000 rpm. Activation was 600 s, immobilization  
398 of antibodies 900 s, followed by washing for 600 s and then binding the S proteins for 300 s. The  
399 data analysis was performed using the FortéBio Data Analysis 12.0 software (FortéBio).

### 400 **Cryo-EM Grid Preparation and Data Collection**

401 3.5  $\mu$ L of 0.8-1.0 mg/ml purified  $\Delta$ N25 or  $\Delta$ N135 Spike complex was applied to the plasma-  
402 cleaned (Gatan Solarus) Quantifoil 1.2/1.3 holey gold grid, and subsequently vitrified using a  
403 Vitrobot Mark IV (FEI Company). Cryo grids were loaded into a Titan Krios transmission  
404 electron microscope (ThermoFisher Scientific) with a post-column Gatan Image Filter (GIF)  
405 operating in nanoprobe at 300 keV with a Gatan K3 Summit direct electron detector and an  
406 energy filter slit width of 20 eV. Images were recorded with Legikon in counting mode with a  
407 pixel size of 0.832 Å and a nominal defocus range of -1.8 to -1.2  $\mu$ m. Images were recorded with  
408 a 1.4 s exposure and 40 ms subframes (35 total frames) corresponding to a total dose of ~ 52  
409 electrons per Å<sup>2</sup>. All details corresponding to individual datasets are summarized in Table S2.

### 410 **Cryo-EM image processing**

411 Dose-fractionated movies were gain-corrected, and beam-induced motion correction using  
412 MotionCor2(37) with the dose-weighting option. The Spike particles were automatically picked  
413 from the dose-weighted, motion corrected average images using Relion 3.0(38). CTF parameters  
414 were determined by Gctf(39). Particles were then extracted using Relion 3.0 with a box size of  
415 440 pixels. The 3D classification and refinement were performed with Relion 3.0 using the  
416 binned datasets. One round of 3D classification was performed to select the homogenous  
417 particles. Unbinned homogenous particles were re-extracted and then submitted to 3D auto-  
418 refinement without symmetry imposed. For Brazilian Spike, cryoDRGN was performed using  
419 the parameters from the last iteration of the 3D auto-refinement. An additional round of no-  
420 alignment 3D classification revealed two distinct conformational states of  $\Delta$ N135 Spike: ~73 %  
421 of particles adopting an open conformation with one erected RBD was further refined without

422 symmetry imposed; ~23 % of particles in the fully closed conformation were further refined with  
423 the C3 symmetry imposed. An additional round of no-alignment 3D classification revealed one  
424 open state of  $\Delta$ N25 Spike and was followed by further refinement without symmetry imposed.  
425 Focus refinements were performed with soft masks around the NTD, RBD, and body regions. 3D  
426 classifications and 3D refinements were started from a 60 Å low-pass filtered version of an ab  
427 initio map generated with Relion 3.0. All resolutions were estimated by applying a soft mask  
428 around the protein complex density and based on the gold-standard (two halves of data refined  
429 independently) FSC $_{0.143}$  criterion. Prior to visualization, all density maps were sharpened  
430 by applying different negative temperature factors using automated procedures, along with the  
431 half maps, were used for model building. Local resolution was determined using ResMap(40)  
432 (Fig. S5).

### 433 **Model building and refinement**

434 The initial template of the Spike complex was derived from a homology-based model calculated  
435 by SWISS-MODEL(41). The model was docked into the EM density map using Chimera(42)  
436 and followed by manually adjustment using COOT(43). Note that the EM density around the  
437 NTD and RBD regions was poor relative to other parts of the model. The NTD and RBD regions  
438 were modeled using the unsharpened maps together with the deepEMhancer maps that were  
439 calculated with the half maps from the focus refinements. Each model was independently  
440 subjected to global refinement and minimization in real space using the module  
441 phenix.real\_space\_refine in PHENIX(44) against separate EM half-maps with default  
442 parameters. The model was refined into a working half-map, and improvement of the model was  
443 monitored using the free half map. Model geometry was further improved using Rosetta. The  
444 geometry parameters of the final models were validated in COOT and using MolProbity(45)and  
445 EMRinger(46). These refinements were performed iteratively until no further improvements  
446 were observed. The final refinement statistics were provided in Table S2. Model overfitting was  
447 evaluated through its refinement against one cryo-EM half map. FSC curves were calculated  
448 between the resulting model and the working half map as well as between the resulting model  
449 and the free half and full maps for cross-validation (Figure S6). Figures were produced using  
450 PyMOL (The PyMOL Molecular Graphics System) and Chimera.

451 **Analytical SEC** An ultra-high-performance liquid chromatography system (Vanquish, Thermo  
452 Scientific) and  $\mu$ DAWN TREOS instrument (Wyatt) coupled to an Optilab  $\mu$ T-rEX Refractive  
453 Index Detector (Wyatt), in combination with an in-line Nanostar DLS reader (Wyatt), was used  
454 for performing the analytical SEC experiment. The cleared crude cell culture supernatants were  
455 applied to a SRT-10C SEC-500 15 cm column, (Sepax Cat# 235500-4615) with the  
456 corresponding guard column (Sepax) equilibrated in running buffer (150 mM sodium phosphate,  
457 50 mM NaCl, pH 7.0) at 0.35 mL/min. When analyzing supernatant samples,  $\mu$ MALS detectors  
458 were offline and analytical SEC data was analyzed using Chromeleon 7.2.8.0 software package.  
459 The signal of supernatants of non-transfected cells was subtracted from the signal of supernatants  
460 of S transfected cells. When purified proteins were analyzed using SEC-MALS,  $\mu$ MALS  
461 detectors were inline and data was analyzed using Astra 7.3 software package.

#### 462 **Cell-cell fusion assay**

463 A GFP-based cell-cell fusion assay was performed to determine the capability of the variant S  
464 protein to mediate membrane fusion. HEK293 cells were transfected with full-length S, human  
465 ACE2, human TMPRSS2 and GFP. All proteins were expressed from pcDNA2004 plasmids  
466 using Trans-IT transfection reagent according to the manufacturer's instructions. 18hr after  
467 transfection, syncytia formation was visualized on an EVOS microscope.

#### 468 **GISAID data acquisition and processing**

469 SARS-CoV-2 genome and sample data were downloaded from the GISAID Initiative  
470 (<https://www.gisaid.org/>) database on 25 Jan 2022, and processed by Biovia Pipeline Pilot  
471 workflows (BIOVIA, Dassault Systèmes, v 21.2.0.2574, San Diego: Dassault Systèmes, 2020) to  
472 transform and standardize the date and country formats, and to retain only human samples. The  
473 data are subsequently saved to files with information on individual lineages and individual  
474 mutations in Spike protein. The data was further analyzed in Tableau ([www.tableau.com](http://www.tableau.com)) to  
475 obtain mutation and lineage frequencies as function of time or location.

476 Phylogenetic trees in Fig 6A and Fig 6C were created using amino-acid sequences of the S-  
477 proteins from GISAID. For each lineage, only one, the most frequent S-protein sequence was  
478 used. Only lineages that had 50 or more identical sequences stored in GISAID as of 25 Jan 2022  
479 were used. The trees were created using the CLC software.



## 481 References

- 482 1. W. H. Chen, P. J. Hotez, M. E. Bottazzi, Potential for developing a SARS-CoV receptor-binding  
483 domain (RBD) recombinant protein as a heterologous human vaccine against coronavirus  
484 infectious disease (COVID)-19. *Hum Vaccin Immunother*, 1-4 (2020).
- 485 2. L. Liu *et al.*, Potent neutralizing antibodies against multiple epitopes on SARS-CoV-2 spike.  
486 *Nature* **584**, 450-456 (2020).
- 487 3. M. Yuan *et al.*, A highly conserved cryptic epitope in the receptor binding domains of SARS-CoV-  
488 2 and SARS-CoV. *Science* **368**, 630-633 (2020).
- 489 4. P. J. M. Brouwer *et al.*, Potent neutralizing antibodies from COVID-19 patients define multiple  
490 targets of vulnerability. *Science*, (2020).
- 491 5. B. J. Bosch, R. van der Zee, C. A. de Haan, P. J. Rottier, The coronavirus spike protein is a class I  
492 virus fusion protein: structural and functional characterization of the fusion core complex. *J Virol*  
493 **77**, 8801-8811 (2003).
- 494 6. F. Li, Structure, Function, and Evolution of Coronavirus Spike Proteins. *Annu Rev Virol* **3**, 237-261  
495 (2016).
- 496 7. D. Wrapp *et al.*, Cryo-EM structure of the 2019-nCoV spike in the prefusion conformation.  
497 *Science* **367**, 1260-1263 (2020).
- 498 8. K. M. Hastie *et al.*, Defining variant-resistant epitopes targeted by SARS-CoV-2 antibodies: A  
499 global consortium study. *Science* **374**, 472-478 (2021).
- 500 9. W. N. Voss *et al.*, Prevalent, protective, and convergent IgG recognition of SARS-CoV-2 non-RBD  
501 spike epitopes. *Science* **372**, 1108-1112 (2021).
- 502 10. X. Chi *et al.*, A neutralizing human antibody binds to the N-terminal domain of the Spike protein  
503 of SARS-CoV-2. *Science* **369**, 650-655 (2020).
- 504 11. D. Li *et al.*, In vitro and in vivo functions of SARS-CoV-2 infection-enhancing and neutralizing  
505 antibodies. *Cell* **184**, 4203-4219 e4232 (2021).
- 506 12. N. Suryadevara *et al.*, Neutralizing and protective human monoclonal antibodies recognizing the  
507 N-terminal domain of the SARS-CoV-2 spike protein. *Cell* **184**, 2316-2331 e2315 (2021).
- 508 13. M. McCallum *et al.*, N-terminal domain antigenic mapping reveals a site of vulnerability for  
509 SARS-CoV-2. *Cell* **184**, 2332-2347 e2316 (2021).
- 510 14. G. Cerutti *et al.*, Potent SARS-CoV-2 neutralizing antibodies directed against spike N-terminal  
511 domain target a single supersite. *Cell Host Microbe* **29**, 819-833 e817 (2021).
- 512 15. D. Haslwanter *et al.*, A Combination of Receptor-Binding Domain and N-Terminal Domain  
513 Neutralizing Antibodies Limits the Generation of SARS-CoV-2 Spike Neutralization-Escape  
514 Mutants. *mBio* **12**, e0247321 (2021).
- 515 16. M. L. Acevedo *et al.*, Infectivity and immune escape of the new SARS-CoV-2 variant of interest  
516 Lambda. *medRxiv*, 2021.2006.2028.21259673 (2021).
- 517 17. M. Hoffmann *et al.*, SARS-CoV-2 variants B.1.351 and P.1 escape from neutralizing antibodies.  
518 *Cell* **184**, 2384-2393 e2312 (2021).
- 519 18. M. McCallum *et al.*, Molecular basis of immune evasion by the Delta and Kappa SARS-CoV-2  
520 variants. *Science* **374**, 1621-1626 (2021).
- 521 19. D. Mannar *et al.*, SARS-CoV-2 Omicron variant: Antibody evasion and cryo-EM structure of spike  
522 protein-ACE2 complex. *Science*, eabn7760 (2022).
- 523 20. J. Sadoff *et al.*, Final Analysis of Efficacy and Safety of Single-Dose Ad26.COV2.S. *N Engl J Med*,  
524 (2022).

- 525 21. R. Bos *et al.*, Ad26 vector-based COVID-19 vaccine encoding a prefusion-stabilized SARS-CoV-2  
526 Spike immunogen induces potent humoral and cellular immune responses. *NPJ Vaccines* **5**, 91  
527 (2020).
- 528 22. J. Juraszek *et al.*, Stabilizing the closed SARS-CoV-2 spike trimer. *Nat Commun* **12**, 244 (2021).
- 529 23. M. A. Tortorici *et al.*, Ultrapotent human antibodies protect against SARS-CoV-2 challenge via  
530 multiple mechanisms. *Science* **370**, 950-957 (2020).
- 531 24. C. O. Barnes *et al.*, SARS-CoV-2 neutralizing antibody structures inform therapeutic strategies.  
532 *Nature* **588**, 682-687 (2020).
- 533 25. D. Pinto *et al.*, Cross-neutralization of SARS-CoV-2 by a human monoclonal SARS-CoV antibody.  
534 *Nature* **583**, 290-295 (2020).
- 535 26. P. J. M. Brouwer *et al.*, Potent neutralizing antibodies from COVID-19 patients define multiple  
536 targets of vulnerability. *Science* **369**, 643-650 (2020).
- 537 27. R. E. Chen *et al.*, Resistance of SARS-CoV-2 variants to neutralization by monoclonal and serum-  
538 derived polyclonal antibodies. *Nat Med* **27**, 717-726 (2021).
- 539 28. S. Iketani *et al.*, Lead compounds for the development of SARS-CoV-2 3CL protease inhibitors.  
540 *Nat Commun* **12**, 2016 (2021).
- 541 29. M. Yuan *et al.*, Structural and functional ramifications of antigenic drift in recent SARS-CoV-2  
542 variants. *Science* **373**, 818-823 (2021).
- 543 30. I. Kimura *et al.*, The SARS-CoV-2 Lambda variant exhibits enhanced infectivity and immune  
544 resistance. *Cell Rep* **38**, 110218 (2022).
- 545 31. S. M. Gobeil *et al.*, Effect of natural mutations of SARS-CoV-2 on spike structure, conformation,  
546 and antigenicity. *Science* **373**, (2021).
- 547 32. M. McCallum *et al.*, SARS-CoV-2 immune evasion by the B.1.427/B.1.429 variant of concern.  
548 *Science* **373**, 648-654 (2021).
- 549 33. H. Nielsen, K. D. Tsirigos, S. Brunak, G. von Heijne, A Brief History of Protein Sorting Prediction.  
550 *Protein J* **38**, 200-216 (2019).
- 551 34. <https://www.ecdc.europa.eu/en/covid-19/variants-concern>.
- 552 35. C. Scheepers *et al.*, Emergence and phenotypic characterization of C.1.2, a globally detected  
553 lineage that rapidly accumulated mutations of concern. *medRxiv*, 2021.2008.2020.21262342  
554 (2021).
- 555 36. P. Colson *et al.*, Emergence in Southern France of a new SARS-CoV-2 variant of probably  
556 Cameroonian origin harbouring both substitutions N501Y and E484K in the spike protein.  
557 *medRxiv*, 2021.2012.2024.21268174 (2021).
- 558 37. S. Q. Zheng *et al.*, MotionCor2: anisotropic correction of beam-induced motion for improved  
559 cryo-electron microscopy. *Nat Methods* **14**, 331-332 (2017).
- 560 38. J. Zivanov *et al.*, New tools for automated high-resolution cryo-EM structure determination in  
561 RELION-3. *Elife* **7**, (2018).
- 562 39. K. Zhang, Gctf: Real-time CTF determination and correction. *J Struct Biol* **193**, 1-12 (2016).
- 563 40. A. Kucukelbir, F. J. Sigworth, H. D. Tagare, Quantifying the local resolution of cryo-EM density  
564 maps. *Nat Methods* **11**, 63-65 (2014).
- 565 41. A. Waterhouse *et al.*, SWISS-MODEL: homology modelling of protein structures and complexes.  
566 *Nucleic Acids Res* **46**, W296-W303 (2018).
- 567 42. E. F. Pettersen *et al.*, UCSF Chimera--a visualization system for exploratory research and analysis.  
568 *J Comput Chem* **25**, 1605-1612 (2004).
- 569 43. P. Emsley, B. Lohkamp, W. G. Scott, K. Cowtan, Features and development of Coot. *Acta*  
570 *Crystallogr D Biol Crystallogr* **66**, 486-501 (2010).
- 571 44. P. V. Afonine *et al.*, Real-space refinement in PHENIX for cryo-EM and crystallography. *Acta*  
572 *Crystallogr D Struct Biol* **74**, 531-544 (2018).

- 573 45. V. B. Chen *et al.*, MolProbity: all-atom structure validation for macromolecular crystallography.  
574 *Acta Crystallogr D Biol Crystallogr* **66**, 12-21 (2010).  
575 46. B. A. Barad *et al.*, EMRinger: side chain-directed model and map validation for 3D cryo-electron  
576 microscopy. *Nat Methods* **12**, 943-946 (2015).  
577
